# Supplementary material for: Effect of Freezing on Gut Microbiota Composition and Functionality for In Vitro Fermentation Experiments
Source: MDPI journal article supplement (doi:10.3390/nu13072207), 2021-06-27

*Effect of freezing on gut microbiota composition and functionality  
for in vitro fermentation experiments*

**Supplemental Information**

**Supplemental Figure S1. Panel A** shows Bray-Curtis dissimilarity values between conditions for ASV composition. **Panel B** shows Bray-Curtis dissimilarity values between conditions for the GMMR.

**A**

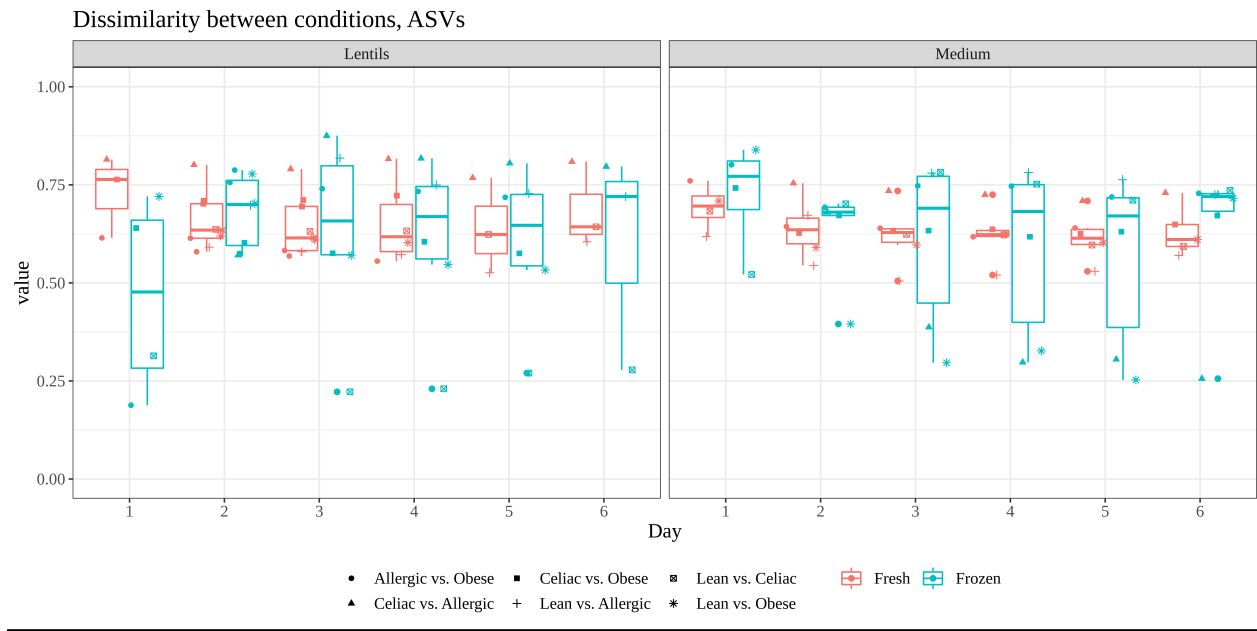

**B**

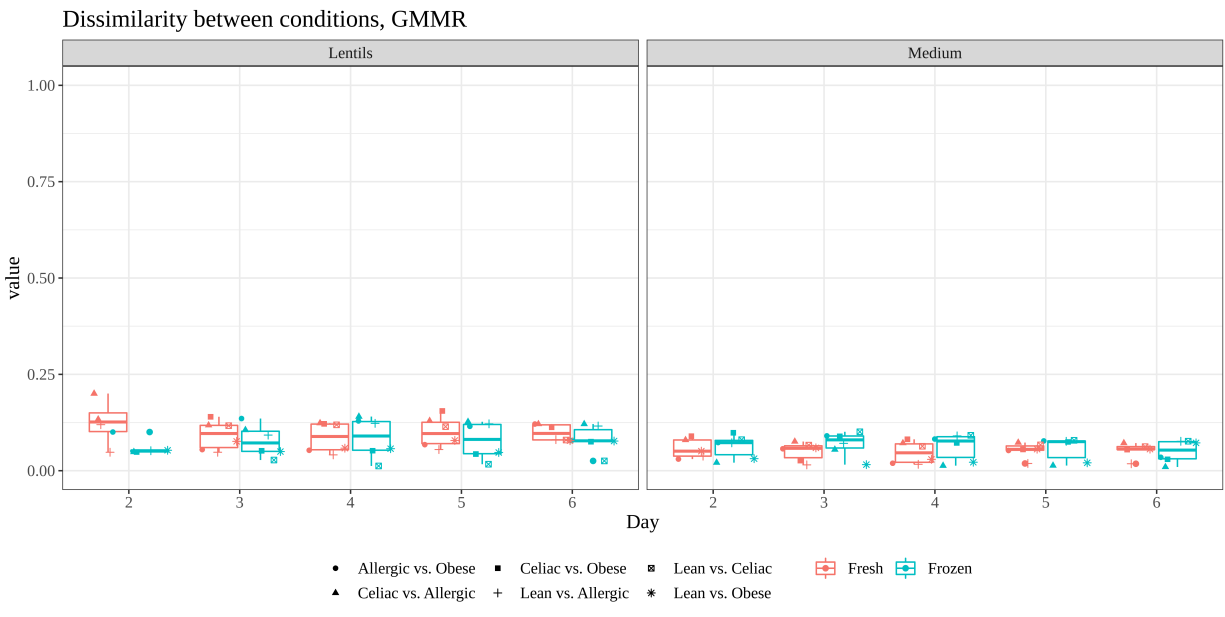

Supplement: s1 [file s1]
